# Supplementary material
Source: PubMed Central journal article supplement (PMC4908648)
Supplement: npp20161x1.pdf [file npp20161x1.pdf]

## Supplementary Material

### Intranasal oxytocin normalizes amygdala functional connectivity in post-traumatic stress disorder

Saskia B.J. Koch, Mirjam van Zuiden, Laura Nawijn, Jessie L. Frijling, Dick J. Veltman & Miranda Olff

#### Contents

|                                                                                                                          |          |
|--------------------------------------------------------------------------------------------------------------------------|----------|
| Supplementary Methods                                                                                                    | page 2-3 |
| Supplementary Table S1: Content of thoughts during scanning                                                              | page 4   |
| Supplementary Table S2: fMRI results after correction for head motion                                                    | page 5   |
| Supplementary Table S3: Post-hoc tests after correction for head motion                                                  | page 6   |
| Supplementary Table S4: Group and sex differences under placebo                                                          | page 7   |
| Supplementary Table S5: Correlations between OT-induced alterations in anxiety and nervousness and amygdala connectivity | page 8   |
| Supplementary Table S6: Correlations between CAPS and amygdala connectivity                                              | page 8   |
| Supplementary Figure S1: Subjective ratings for male and female PTSD patients                                            | page 9   |

## **Supplementary methods**

### ***Preprocessing and first-level model***

After discarding the first five images, preprocessing consisted of realignment, slice-time correction, co-registration to the anatomical scan, spatial normalization to the Montreal Neurological Institute (MNI) template, resampling to 2mm<sup>3</sup> voxels and spatial smoothing with a 8mm full-width half maximum (FWHM) Gaussian filter. For each participant, the first eigenvariates of left and right BLA and CeM amygdala time-courses were extracted using the Volume of Interest module in SPM8. For each amygdala seed (i.e. left & right CeM, left & right BLA) and each participant, a first-level model was created including the extracted amygdala time-course as regressor of interest and eight nuisance regressors: six realignment parameters to account for movement and the mean white matter and cerebrospinal fluid signals extracted from the tissue probabilities maps of SPM (thresholded at 0.5). In addition, we used a high-pass filter of 1/128Hz to remove slow drifts of the signal and the AR(1) process to remove temporal autocorrelations. Due to signal drop-out in the temporal cortex, a more stringent probability threshold of 80% (and hence a smaller seed) was used for the BLA subregion (signal drop-out in 50% probability BLA seed: n=7; signal drop-out in 80% probability BLA seed: n=3).

### ***Exclusion of participants***

Two trauma-exposed controls were excluded from the analyses due to scanner artifacts and two male and two female PTSD patient were excluded due to excessive movement (i.e. >6mm/ degrees in any direction). In total, 33 PTSD patients (19 males) and 38 trauma-exposed controls (19 males) were included in the CeM subregion analyses. For BLA amygdala subregion analyses, participants had to be excluded because of signal drop-out in voxels belonging to these seeds, resulting in 33 PTSD patients (19 males) and 37 trauma-exposed controls (19 males) for the left BLA and 31 patients (18 males) and 38 trauma-exposed controls (19 males) for the right BLA (See also the CONSORT flow diagram below). To assure that our results were not driven by excessive head movement, we reran the analyses after excluding participants moving > 3mm/degrees in any direction. In total one female trauma-exposed

control, four male PTSD patients and four female PTSD patients were removed for this analysis, resulting in 29 PTSD patients (17 males) and 37 trauma-exposed controls (19 males) for the CeM subregion analysis and 29 patients (17 males) and 36 controls (19 males) for the left BLA and 27 patients (16 males) and 37 controls (19 males) for the right BLA analysis.

**Supplementary Table S1: Content of thought during resting-state scanning for both fMRI sessions**

A)

|                         |                      | First session (T1) | Second session (T2) | Difference between T1 and T2 |         |
|-------------------------|----------------------|--------------------|---------------------|------------------------------|---------|
|                         |                      | N (%)              | N (%)               | Wilcoxon Signed Rank test    | p-value |
| All participants        | Total responses      | 75 (100%)          | 74 (100%)           | -0.378                       | 0.705   |
|                         | Alternating thoughts | 64 (85.33%)        | 64 (86.49%)         |                              |         |
|                         | Specific thoughts    | 11 (14.67%)        | 10 (13.51%)         |                              |         |
| Trauma-exposed controls | Total responses      | 39 (100%)          | 39 (100%)           | < 0.001                      | 1.000   |
|                         | Alternating thoughts | 35 (89.74%)        | 35 (89.74%)         |                              |         |
|                         | Specific thoughts    | 4 (10.26%)         | 4 (10.26%)          |                              |         |
| PTSD patients           | Total responses      | 36 (100%)          | 35 (100%)           | -0.577                       | 0.564   |
|                         | Alternating thoughts | 29 (80.56%)        | 29 (82.86%)         |                              |         |
|                         | Specific thoughts    | 7 (19.44%)         | 6 (17.14%)          |                              |         |

B)

|                         |    | Leisure (N) | PTSD related (N) | Future (N) | Other (N)  | Total (N) |
|-------------------------|----|-------------|------------------|------------|------------|-----------|
| All participants        | T1 | 3 (27.27%)  | 3 (27.27%)       | 3 (27.27%) | 1 (9.09%)  | 11 (100%) |
|                         | T2 | 4 (40.00%)  | 3 (30.00%)       | 2 (20.00%) | 1 (10.00%) | 10 (100%) |
| Trauma-exposed controls | T1 | 3 (75.00%)  | 0 (0.00%)        | 1 (25.00%) | 0 (0.00%)  | 4 (100%)  |
|                         | T2 | 3 (75.00%)  | 0 (0.00%)        | 1 (25.00%) | 0 (0.00%)  | 4 (100%)  |
| PTSD patients           | T1 | 0 (0.00%)   | 3 (42.86%)       | 2 (28.57%) | 2 (28.57%) | 7 (100%)  |
|                         | T2 | 1 (16.67%)  | 3 (50.00%)       | 1 (16.67%) | 1 (16.67%) | 6 (100%)  |

A) Number (percentage) of participants reporting thoughts about a specific topic (specific thoughts) or alternating thoughts (as instructed). B) Number (percentage) of thought content categories for those participants reporting specific thoughts during scanning. Leisure: sports, activities, family or friends. Seven out of eleven participants reporting specific thoughts topic during the first resting-state scanning session (T1), also reported specific thoughts during the second resting-state session (T2). Number of PTSD patients and trauma-exposed controls reporting specific thoughts was not significantly different during T1 (Mann Whitney U = 637.5; p = 0.264) and T2 (Mann Whitney U = 635.50; p = 0.390).

**Supplementary Table S2: Neuroimaging results after excluding extra participants based on movement (>3mm/degree)**

| Contrast                                   | Seed      | Region | Hemisphere | MNI |    |    | Z-score | p <sub>FWE</sub> |
|--------------------------------------------|-----------|--------|------------|-----|----|----|---------|------------------|
|                                            |           |        |            | x   | y  | z  |         |                  |
| <b>Centromedial amygdala (CeM)</b>         |           |        |            |     |    |    |         |                  |
| Group x Sex x Drug interaction (F-test)    | Right CeM | vmPFC  | L          | -2  | 30 | -8 | 3.31    | 0.009            |
| Group x Sex interaction (F-test) – placebo | Right CeM | vmPFC  | R          | 2   | 30 | -8 | 2.96    | 0.023            |
| <b>Basolateral amygdala (BLA)</b>          |           |        |            |     |    |    |         |                  |
| Group x Sex x Drug interaction (F-test)    | Right BLA | dACC   | L          | -8  | 50 | 16 | 3.25    | 0.077            |
| Group x Sex x Drug interaction (F-test)    | Right BLA | dACC   | R          | 6   | 38 | 3  | 4.04    | 0.006            |

fMRI results after excluding additional participants based on head motion (i.e. > 3mm/degrees in any direction, see supplementary material page 2-3 for excluded participants). Coordinates (xyz) are given in MNI stereotaxic space. p<sub>FWE</sub> corrected for multiple comparisons within the region of interest.

L = left, R = right, vmPFC = ventromedial prefrontal cortex, dACC = dorsal anterior cingulate cortex

**Supplementary Table S3: Results of post-hoc tests after excluding additional participants based on head movement (> 3mm/degree)**

|                                                                                    | Seed      | Region | Hemisphere | t(df)            | p-value                |
|------------------------------------------------------------------------------------|-----------|--------|------------|------------------|------------------------|
| <b>Group x Sex x Drug interaction effect - right CeM – left vmPFC connectivity</b> |           |        |            |                  |                        |
| Placebo – male controls > male PTSD                                                | Right CeM | vmPFC  | L          | t(34) = 3.726    | p = 0.001*             |
| Placebo – female PTSD > female controls                                            | Right CeM | vmPFC  | L          | t(28) = -2.155   | p = 0.040              |
| Oxytocin – male controls > male PTSD                                               | Right CeM | vmPFC  | L          | t(34) = -0.251   | p = 0.803              |
| Male control: placebo > oxytocin                                                   | Right CeM | vmPFC  | L          | t(18) = 1.706    | p = 0.105              |
| Male PTSD: oxytocin > placebo                                                      | Right CeM | vmPFC  | L          | t(16) = -3.014   | p = 0.008 <sup>#</sup> |
| <b>Group x Sex interaction effect - right CeM – right vmPFC connectivity</b>       |           |        |            |                  |                        |
| Placebo – male controls > male PTSD                                                | Right CeM | vmPFC  | R          | t(33.53) = 2.928 | p = 0.006*             |
| Placebo – female PTSD > female controls                                            | Right CeM | vmPFC  | R          | t(28) = -2.249   | p = 0.033              |
| <b>Group x Sex x Drug interaction – right BLA – right dACC connectivity</b>        |           |        |            |                  |                        |
| Placebo – male controls > male PTSD                                                | Right BLA | dACC   | R          | t(33) = 1.132    | p = 0.266              |
| Placebo – female PTSD > female controls                                            | Right BLA | dACC   | R          | t(27) = -3.080   | p = 0.005*             |
| Oxytocin – female controls > female PTSD                                           | Right BLA | dACC   | R          | t(27) = -0.396   | p = 0.695              |
| Female control: oxytocin > placebo                                                 | Right BLA | dACC   | R          | t(17) = -1.480   | p = 0.157              |
| Female PTSD: placebo > oxytocin                                                    | Right BLA | dACC   | R          | t(10) = 3.594    | p = 0.005*             |
| <b>Group x Sex x Drug interaction – right BLA – left dACC connectivity</b>         |           |        |            |                  |                        |
| Placebo – male controls > male PTSD                                                | Right BLA | dACC   | L          | t(33) = 1.218    | p = 0.232              |
| Placebo – female PTSD > female controls                                            | Right BLA | dACC   | L          | t(27) = -2.209   | p = 0.036              |
| Oxytocin – female controls > female PTSD                                           | Right BLA | dACC   | L          | t(27) = -0.111   | p = 0.913              |
| Female control: oxytocin > placebo                                                 | Right BLA | dACC   | L          | t(17) = -0.844   | p = 0.410              |
| Female PTSD: placebo > oxytocin                                                    | Right BLA | dACC   | L          | t(10) = 2.557    | p = 0.029              |

Results of the post-hoc independent or paired-sample t-tests testing the interaction effects displayed in Supplementary Table S2 after excluding additional participants based on excessive head movement (i.e. > 3mm/ degree in any direction).

L = left, R = right, CeM = centromedial nucleus, BLA = Basolateral nucleus, vmPFC = ventromedial prefrontal cortex, dACC = dorsal anterior cingulate cortex, df = degrees of freedom

\* significant at p < 0.0063 level corrected for multiple comparisons

**Supplementary Table S5: Main effects of group, sex and group by sex interactions under placebo**

| Contrast                         | Seed        | Region | Hemisphere | MNI |    |    | Z-score | p <sub>FWE</sub> |
|----------------------------------|-------------|--------|------------|-----|----|----|---------|------------------|
|                                  |             |        |            | x   | y  | z  |         |                  |
| <b>BLA – left</b>                |             |        |            |     |    |    |         |                  |
| Sex x Group interaction (F-test) | BLA – left  | Insula | R          | 34  | 22 | -4 | 3.93    | 0.007            |
| Controls: male > female (t-test) | BLA – left  | Insula | R          | 34  | 22 | 2  | 3.33    | 0.045            |
| Patients: female > male (t-test) | BLA – left  | Insula | R          | 34  | 22 | -4 | 2.87    | 0.152            |
| <b>BLA – right</b>               |             |        |            |     |    |    |         |                  |
| Sex x Group interaction (F-test) | BLA – right | IFG    | L          | -50 | 18 | 4  | 3.69    | 0.006            |
| Controls: male > female (t-test) | BLA – left  | IFG    | L          | -48 | 16 | 6  | 3.74    | 0.005            |
| Patients: female > male (t-test) | BLA – left  | IFG    | L          | -50 | 18 | 4  | 2.36    | 0.186            |

Significant group by sex interaction effects are reported. No significant main effects of group and sex were found for bilateral CeM or BLA functional connectivity (all p<sub>FWE</sub> > 0.05). MNI = Montreal Neurological Institute coordinates. p<sub>FWE</sub> values were small volume corrected within the region of interest.

**Supplementary Table S6: Correlations between OT-induced reductions in anxiety and nervousness and OT-induced alterations in amygdala functional connectivity**

|                                                 | <b>Δ right CeM – left vmPFC FC (PL-OT) (male PTSD)</b> | <b>Δ right BLA – right dACC FC (PL-OT) (female PTSD)</b> |
|-------------------------------------------------|--------------------------------------------------------|----------------------------------------------------------|
| <b>Δ VAS anxiety (PL-OT) after scanning</b>     | r=0.333; p=0.192                                       | r=0.218; p=0.496                                         |
| <b>Δ VAS nervousness (PL-OT) after scanning</b> | r=0.336; p=0.188                                       | r=-0.194; p=0.546                                        |

Correlations between OT-induced reductions in anxiety and nervousness and OT-induced alterations in amygdala functional connectivity, for right CeM connectivity in male PTSD patients and for right BLA connectivity in female PTSD patients. Contrast estimates were extracted using Marsbar, with a 5mm sphere around the peak voxel of the group by sex by drug interaction effects. Partial correlations were conducted, controlling for drug-order. FC=functional connectivity, CeM = centromedial amygdala, vmPFC = ventromedial prefrontal cortex, BLA = basolateral amygdala, dACC = dorsal anterior cingulate cortex, CAPS = clinician administered PTSD scale

**Supplementary Table S7: Correlations between amygdala connectivity and PTSD symptom severity in male and female PTSD patients**

|                                                 | <b>Right CeM – left vmPFC FC (male PTSD)</b> | <b>Right BLA – right dACC FC (female PTSD)</b> |
|-------------------------------------------------|----------------------------------------------|------------------------------------------------|
| <b>Total PTSD symptom severity (CAPS-total)</b> | r=0.205; p=0.432                             | r=-0.152; p=0.637                              |
| <b>Re-experiencing symptoms (CAPS-B)</b>        | r=-0.178; p=0.493                            | r=0.208; p=0.516                               |
| <b>Avoidance symptoms (CAPS-C)</b>              | r= 0.299; p=0.244                            | r=-0.295; p=0.352                              |
| <b>Hyperarousal symptoms (CAPS-D)</b>           | r=0.292; p=0.256                             | r=-0.322; p=0.307                              |

Correlations between PTSD symptom severity and amygdala functional connectivity, for right CeM functional connectivity in male PTSD patients and for right BLA connectivity in female PTSD patients (after placebo administration only). Contrast estimates were extracted using Marsbar, with a 5mm sphere around the peak voxel of the group by sex by drug interaction effects. Partial correlations were conducted, controlling for drug order. FC = functional connectivity; CeM = centromedial nucleus, vmPFC = ventromedial prefrontal cortex, BLA = basolateral nucleus, dACC = dorsal anterior cingulate cortex, CAPS = clinician administered PTSD scale



**Figure S1: Subjective mood and anxiety ratings for male and female PTSD patients separately**

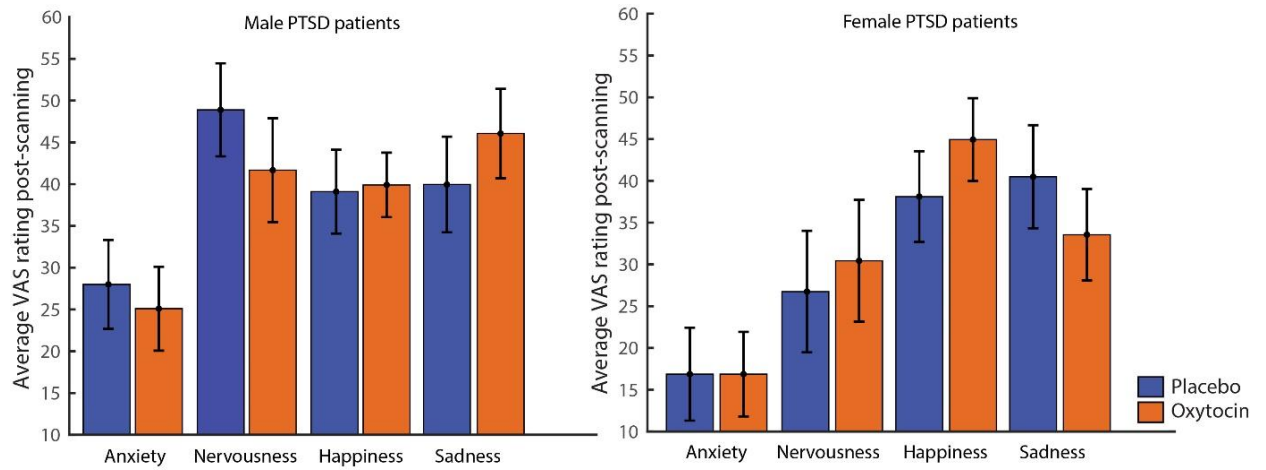

Subjective mood and anxiety ratings after oxytocin and placebo administration on a Visual Analogue Scale (VAS) (0-100) for male and female PTSD patients separately. Drug x sex interaction effects were non-significant and differences between male and female PTSD patients were therefore not reported in the manuscript.
